# Supplementary figures and images for: Ectopic high endothelial venules in pancreatic ductal adenocarcinoma: A unique site for targeted delivery
Source: PubMed Central journal article supplement — eBioMedicine. 2018 Nov 27;38:79–88. doi: 10.1016/j.ebiom.2018.11.030 (PMC6306381; doi:10.1016/j.ebiom.2018.11.030), 2018-11-27

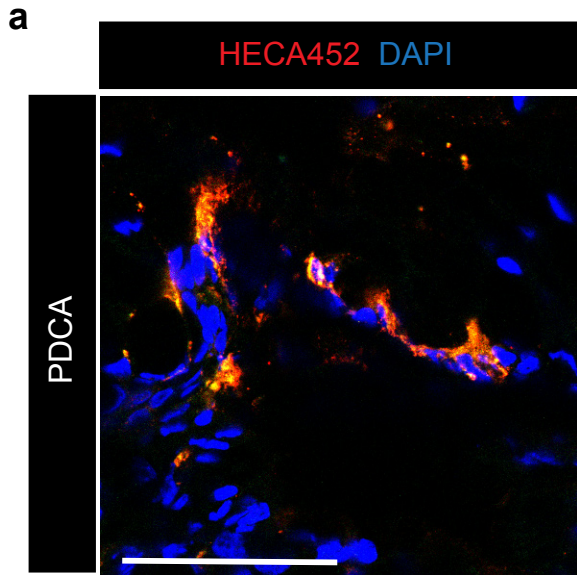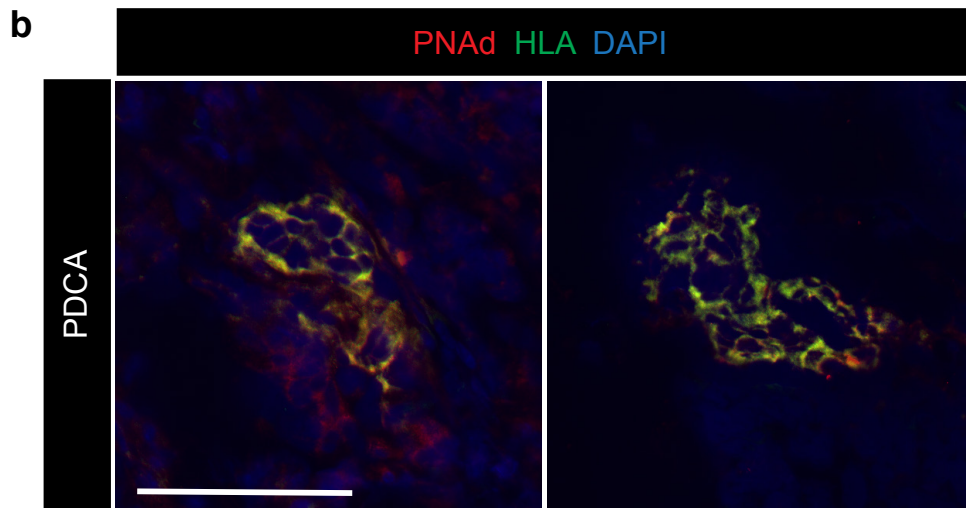

**a**

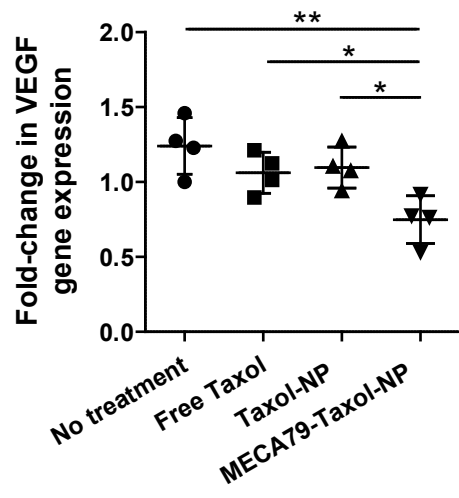

Supplement: mmc1.pdf [file mmc1.pdf]
